# Supplementary material for: Fabrication of highly sensitive flexible phototransistors through a unidirectional floating film transfer method using P4T2F-HD thin films
Source: Royal Society of Chemistry journal article supplement (doi:10.1039/d4tc02386b), 2024-01-01
Supplement: d4tc02386b1.pdf [file d4tc02386b1.pdf]

# **Fabrication of Highly Sensitive Flexible Phototransistors through Unidirectional Floating Film Transfer Method Using P4T2F-HD Thin Film**

**Radhe Shyam<sup>1</sup>, Takaaki Manaka<sup>2</sup>, Rajiv Prakash<sup>1,3\*</sup>**

<sup>1</sup>School of Materials Science and technology Indian Institute of Technology (BHU), Varanasi, 221005, India

<sup>2</sup> Department of Electrical and Electronic Engineering, Tokyo Institute of Technology, Tokyo, 152-8552, Japan

<sup>3</sup> Indian Institute of Technology, Bilai- 491001, Chhattisgarh, India.

### Supplementary Information SI-1

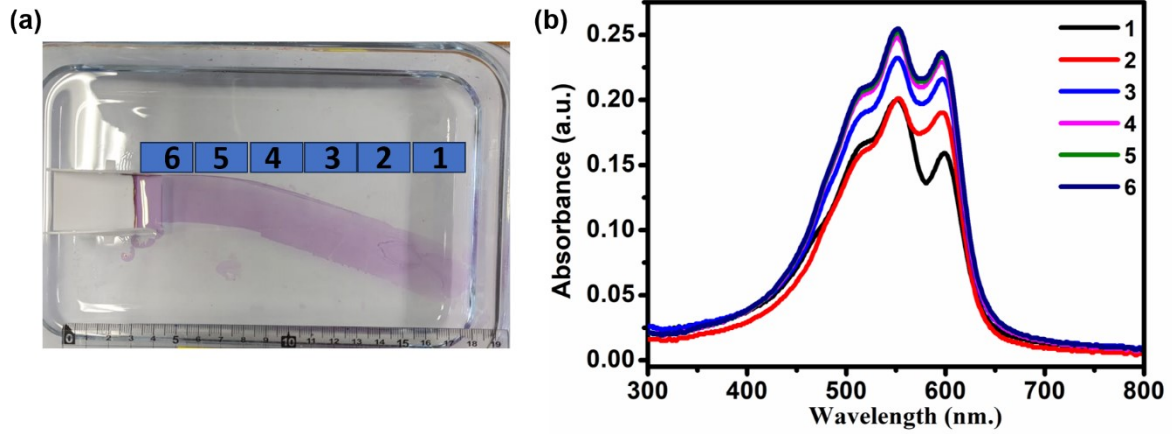

**Figure S1:** (a) represents the UFTM thin film with the no of samples fabricated from the film (b) represents the UV-spectrum of different samples from the UFTM thin film

### Supplementary Information SI-2

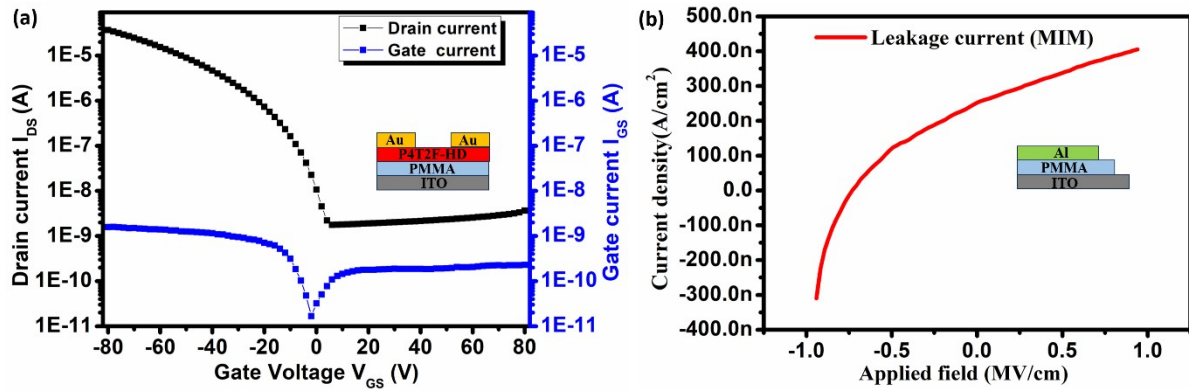

**Figure S2:** (a) Represents the gate current from the TFT along with drain current (b) leakage current from the MIM structure.

### Supplementary Information SI-3

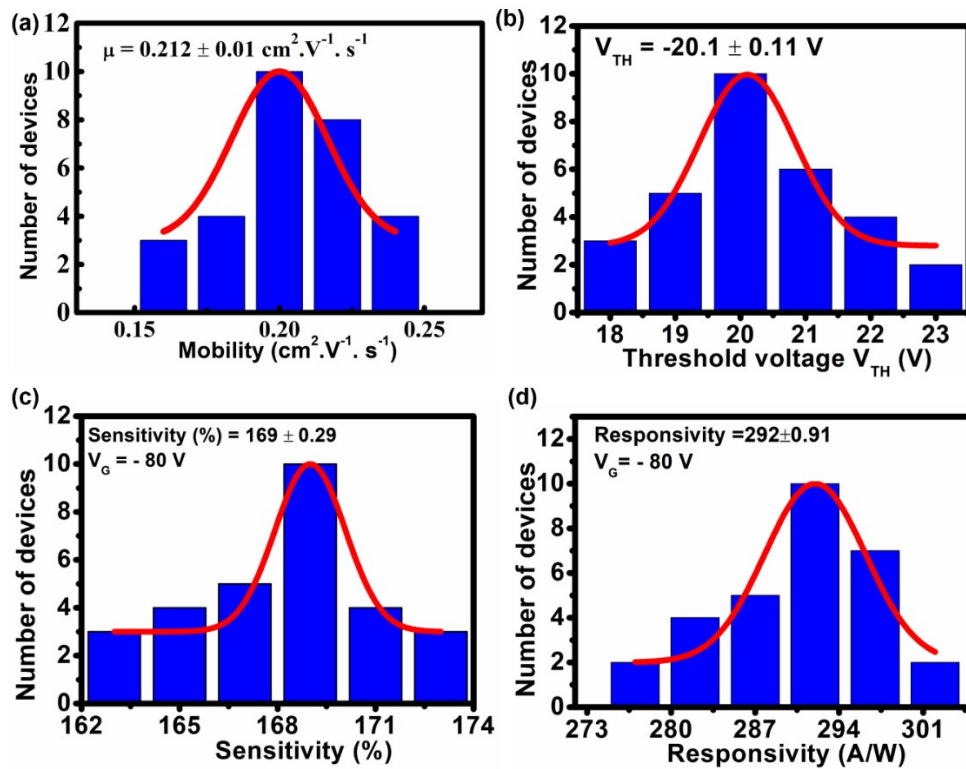

**Figure S3:** represents the static data of (a) mobility v/s devices fabricated in different batches, (b) threshold voltage of different devices, (c) sensitivity of devices at -80V at intensity of 125  $\mu\text{W}/\text{cm}^2$  (d) responsivity of devices at -80V at intensity of 125  $\mu\text{W}/\text{cm}^2$ .

### Supplementary Information SI-4

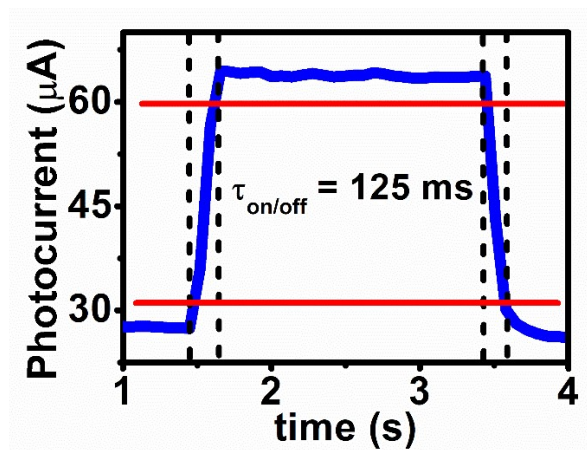

**Figure S4:** represents the on/off switching of OPTs.
